# Supplementary material
Source: PubMed Central journal article supplement (PMC6662590)
Supplement: NIHMS1037451-supplement-Supplemental_Data.pdf [file NIHMS1037451-supplement-Supplemental_Data.pdf]

Supplementary Table 1 | Study demographics for the European Prospective Investigation into Cancer and Nutrition (EPIC) study (N cases=2,341) (N controls=341, 082)

|                               | Controls        |       | Cases      |       |
|-------------------------------|-----------------|-------|------------|-------|
|                               | n               | (%)   | n          | (%)   |
| Sex                           |                 |       |            |       |
| Female                        | 232,699         | 68.2  | 1,031      | 44.0  |
| Male                          | 108,383         | 31.8  | 1,310      | 56.0  |
| Age at recruitment (mean±sd)  | 51.3<br>(10.04) |       | 58.1 (7.5) |       |
| Education level               |                 |       |            |       |
| Basic/elementary              | 109,219         | 32.0  | 1,101      | 47.0  |
| Up to high school graduate    | 147,406         | 43.2  | 946        | 40.4  |
| Some postsecondary and higher | 84,457          | 24.8  | 294        | 12.6  |
| Missing or unspecified        |                 |       |            |       |
| Race/ethnicity                |                 |       |            |       |
| White                         | 341,082         | 100.0 | 2,341      | 100.0 |
| Black, African-American       | 0               |       | 0          |       |
| Asian                         | 0               |       | 0          |       |
| Hispanic                      | 0               |       | 0          |       |
| Other unknown                 | 0               |       | 0          |       |
| Smoking groups                |                 |       |            |       |
| Never                         | 165,114         | 48.4  | 221        | 9.4   |
| Current                       |                 |       |            |       |
| 1-15 cig/day                  | 36,649          | 10.7  | 467        | 19.9  |
| 16-25 cig/day                 | 20,482          | 6.0   | 564        | 24.1  |
| 26+ cig/day                   | 7,206           | 2.1   | 258        | 11.0  |
| Former                        |                 |       |            |       |
| Quit ≤10 years                | 33,797          | 9.9   | 298        | 12.7  |
| Quit 11<20 years              | 30,234          | 8.9   | 145        | 6.2   |
| Quit 20+ years                | 29,171          | 8.6   | 111        | 4.7   |
| Other/unknown smoking         | 18,429          | 5.4   | 277        | 11.8  |

Supplementary Table 2 | Web Table – Study Description – See accompanying excel table

Supplementary Table 3 | Web Table – Alcohol Questionnaire descriptions – See accompanying excel table

Supplementary Table 4 |Sensitivity analyses of associations with categories of grams of alcohol consumption combined, adjusted for occupational exposures combined in the International Lung Cancer Consortium and Synergy Consortium Study population. Effect estimates from random effects models across studies.

|                                     | n<br>studies | n<br>cases | n<br>controls | OR <sup>1</sup> | 95% CI    |
|-------------------------------------|--------------|------------|---------------|-----------------|-----------|
| <b>No adjustment for occupation</b> |              |            |               |                 |           |
| 0 g/day                             | 6            | 1,291      | 1,576         | 1.00            | REF       |
| 0-4.9 g/day                         | 6            | 776        | 1,261         | 0.73            | 0.64-0.83 |
| 5-9.9 g/day                         | 6            | 723        | 1,026         | 0.85            | 0.74-0.97 |
| 10-19.9 g/day                       | 6            | 1,139      | 1,482         | 0.83            | 0.73-0.94 |
| 20-29.9 g/day                       | 6            | 759        | 735           | 1.06            | 0.91-1.23 |
| 30-44.9 g/day                       | 6            | 737        | 789           | 0.89            | 0.77-1.04 |
| ≥45 g/day                           | 6            | 969        | 758           | 0.92            | 0.80-1.07 |
| <b>Adjustment for List A</b>        |              |            |               |                 |           |
| 0 g/day                             | 6            | 1,291      | 1,576         | 1.00            | REF       |
| 0-4.9 g/day                         | 6            | 776        | 1,261         | 0.73            | 0.64-0.83 |
| 5-9.9 g/day                         | 6            | 723        | 1,026         | 0.84            | 0.74-0.97 |
| 10-19.9 g/day                       | 6            | 1,139      | 1,482         | 0.83            | 0.73-0.94 |
| 20-29.9 g/day                       | 6            | 759        | 735           | 1.05            | 0.91-1.22 |
| 30-44.9 g/day                       | 6            | 737        | 789           | 0.89            | 0.77-1.04 |
| ≥45 g/day                           | 6            | 969        | 758           | 0.92            | 0.79-1.06 |
| <b>Adjustment for List B</b>        |              |            |               |                 |           |
| 0 g/day                             | 6            | 1,291      | 1,576         | 1.00            | REF       |
| 0-4.9 g/day                         | 6            | 776        | 1,261         | 0.73            | 0.64-0.83 |
| 5-9.9 g/day                         | 6            | 723        | 1,026         | 0.85            | 0.74-0.97 |
| 10-19.9 g/day                       | 6            | 1,139      | 1,482         | 0.83            | 0.73-0.94 |
| 20-29.9 g/day                       | 6            | 759        | 735           | 1.05            | 0.91-1.22 |
| 30-44.9 g/day                       | 6            | 737        | 789           | 0.89            | 0.77-1.04 |
| ≥45 g/day                           | 6            | 969        | 758           | 0.92            | 0.79-1.06 |

<sup>1</sup>Models adjusted for sex, age group, pack-years, education, ethnicity and study. Examined in a combined model for those studies where standardized occupational data was available (CE, Toronto, Montreal, EAGLE, ICARE and CAPUA).

Supplementary Table 5 | Evaluation of potential confounding by presence of Tuberculosis in subjects from Central European study

|                                                                            | Average lifetime alcohol intake (g/day) |                |                  |                   |                   |                   |                 |               |
|----------------------------------------------------------------------------|-----------------------------------------|----------------|------------------|-------------------|-------------------|-------------------|-----------------|---------------|
|                                                                            | 0g<br>n (%)                             | 0-4.9<br>n (%) | 5-9.9 g<br>n (%) | 10-19.9g<br>n (%) | 20-29.9g<br>n (%) | 30-44.9g<br>n (%) | 45-89g<br>n (%) | 90+g<br>n (%) |
| <b>Ever reporting a history of Tuberculosis at diagnosis or interview</b>  |                                         |                |                  |                   |                   |                   |                 |               |
| <b>No TB</b>                                                               | 1131 (22.76)                            | 782 (15.73)    | 633 (12.74)      | 799 (16.08)       | 479 (9.64)        | 422 (8.49)        | 427 (8.59)      | 297 (5.98)    |
| <b>TB</b>                                                                  | 80 (22.41)                              | 55 (15.41)     | 45 (12.61)       | 50 (14.01)        | 35 (9.8)          | 34 (9.52)         | 32 (8.96)       | 26 (7.28)     |
| <b>Self-reported TB more than 10 years prior to diagnosis or interview</b> |                                         |                |                  |                   |                   |                   |                 |               |
| <b>No TB</b>                                                               | 1141 (22.72)                            | 790 (15.73)    | 641 (12.77)      | 803 (15.99)       | 487 (9.7)         | 426 (8.48)        | 432 (8.6)       | 301 (5.99)    |
| <b>TB</b>                                                                  | 67 (22.79)                              | 45 (15.31)     | 36 (12.24)       | 44 (14.97)        | 27 (9.18)         | 28 (9.52)         | 26 (8.84)       | 21 (7.14)     |

TB, tuberculosis

Supplementary Table 2 | International Lung Cancer Consortium and Synergy Study Details

| Study abbreviation | Study name                                                                    | Principal Investigator(s) | Reference                                                                            | Country/Continent            | Study Period* | Study Design/Control type | Cases | Controls |
|--------------------|-------------------------------------------------------------------------------|---------------------------|--------------------------------------------------------------------------------------|------------------------------|---------------|---------------------------|-------|----------|
| NCI-Maryland       | National Cancer Institute Lung Cancer Study                                   | C.C. Harris               | Meinhold CL et al., 2011, <i>Int J Cancer</i> <b>128</b> :1404.                      | U.S.A./North America         | 1998-2009     | Pop. & Hosp. C-C          | 1082  | 1532     |
| HSPH               | Harvard School of Public Health Lung Cancer Study                             | D. Christiani             | Miller DP et al., 2002, <i>Cancer Res</i> <b>62</b> :2819.                           | U.S.A./North America         | 1992-2008     | Hosp. C-C                 | 1092  | 200      |
| NELCS              | New England Lung Cancer Study                                                 | E. Duell                  | Heck JE et al., 2009, <i>Environ Health Perspect</i> <b>117</b> :1718.               | U.S.A./North America         | 2005-2008     | Pop. C-C                  | 240   | 235      |
| MSK                | Memorial Sloan-Kettering Cancer Centre                                        | I. Orlow, B Park          | NA                                                                                   | U.S.A./North America         | 2003-2006     | Hosp. C-C                 | 80    | 76       |
| WELD               | Women's Epidemiology of Lung Disease                                          | A.G. Schwartz             | Schwartz AG et al., 2009, <i>J thorac Oncol</i> <b>4</b> :291.                       | U.S.A./North America         | 2001-2005     | Pop. C-C                  | 570   | 566      |
| UCLA               | UCLA-USC Health Study                                                         | ZF. Zhang                 | Cui Y et al., 2006, <i>Int J Cancer</i> <b>118</b> :714.                             | U.S.A./North America         | 1999-2004     | Pop. C-C                  | 610   | 1039     |
| Moffitt            | Moffitt study of lung cancer                                                  | P. Lazarus                | Gallagher CJ et al., 2007, <i>Cancer Epidemiol Biomarkers Prev</i> <b>16</b> :823.   | U.S.A./North America         | 1999-2003     | Hosp. C-C                 | 497   | 885      |
| FHS                | Family Health Study III                                                       | A.G. Schwartz             | Cote ML et al., 2005, <i>JAMA</i> <b>293</b> :3036.                                  | U.S.A./North America         | 1990-2003     | Pop. C-C                  | 532   | 706      |
| Toronto            | Greater Toronto Area Lung Cancer Study (Toronto)                              | J. McLaughlin             | Brenner DR et al., 2010, <i>BMC Cancer</i> <b>10</b> :285.                           | Canada/North America         | 1997-2002     | Pop. & Hosp. C-C          | 251   | 633      |
| Montreal           | Montreal case-control study of environmental causes of cancer                 | J. Siemiatycki            | Benedetti A et al., 2006, <i>Cancer Causes Control</i> <b>17</b> :469.               | Canada/North America         | 1996-2002     | Pop. C-C                  | 1090  | 1458     |
| Hawaii             | Study of Diet and Cancer (University of Hawaii)                               | L. LeMarchand             | Le Marchand L et al., 2000, <i>J Natl Cancer Inst</i> <b>92</b> :154.                | U.S.A./Hawaii/ North America | 1992-1997     | Pop. C-C                  | 340   | 454      |
| CAPUA              | Cancer de Pulmon en Asturias                                                  | A. Tardon                 | López-Cima MF et al., 2012, <i>BMC Cancer</i> <b>12</b> :433.                        | Spain/Europe                 | 2000-2010     | Hosp. C-C                 | 584   | 630      |
| Spain              | Spain Lung Cancer Study                                                       | Barros-Dios               | Barros-Dios JM et al., 2012, <i>Cancer Epidemiol Biomarkers Prev</i> <b>21</b> :951. | Spain/Europe                 | 2005-2007     | Hosp. C-C                 | 441   | 548      |
| Israel             | Molecular Epidemiology of Lung Cancer                                         | G. Rennert                | NA                                                                                   | Israel/Europe                | 2005-         | Pop. C-C                  | 341   | 332      |
| ICARE              | Investigation of occupational and environmental causes of respiratory cancers | I. Stucker                | Luce D et al., 2011, <i>BMC Public Health</i> <b>11</b> :928.                        | France/Europe                | 2001-2007     | Pop. C-C                  | 2584  | 3335     |
| EAGLE              | Environment and Genetics in Lung Cancer Study Etiology                        | M.T. Landi                | Landi MT et al., 2008, <i>BMC Public Health</i> <b>8</b> :1471.                      | Italy/Europe                 | 2002-2005     | Pop. C-C                  | 1720  | 2058     |
| ESTHER             | ESTHER Study                                                                  | H. Brenner                | Truong T et al., 2010, <i>J Natl Cancer Inst</i> <b>102</b> :959.                    | Germany/Europe               | 2001-2003     | Pop. C-C                  | 206   | 206      |
| CE                 | INCO Central Europe Health Study                                              | P. Boffetta, P. Brennan   | Brennan, P et al., 2006 <i>Am J Epidemiol</i> <b>164</b> :1233.                      | Europe/ Multi-country        | 1998-2002     | Pop. & Hosp. C-C          | 2615  | 2689     |
| EPIC               | European Prospective Investigation of Cancer                                  | P. Vineis                 | Riboli E. et al., 1992, <i>Ann Oncol</i> <b>3</b> :783.                              | Europe/ Multi-country        | 1993-1998     | Cohort                    | 2341  | 341082   |
| INSERM             | INSERM                                                                        | I. Stucker                | NA                                                                                   | France/Europe                | 2001-         | Hosp. C-C                 | 139   | 168      |
| Seoul              | Seoul Study of lung cancer                                                    | Y.C. Hong                 | Kim JH et al., 2013, <i>Environ Health Toxicol</i> <b>28</b> :e2013012.              | Korea/Asia                   | 2001-2008     | Hosp. C-C                 | 376   | 675      |
| Aichi              | Aichi Cancer Centre                                                           | K. Matsuo                 | Ito H et al., 2013, <i>Ann Oncol</i> <b>24</b> :2870.                                | Japan/Asia                   | 2001-2005     | Hosp. C-C                 | 1418  | 2833     |

Supplementary Table 3 | Alcohol data availability and details across studies

| Study name   | Ever drinker definition                             | Current drinker definition                                                | Duration variables | Intensity variables |
|--------------|-----------------------------------------------------|---------------------------------------------------------------------------|--------------------|---------------------|
| NCI-Maryland | "more than 12 bevs per year ever"                   | none - can calculate                                                      | yes                | yes                 |
| HSPH         | did you ever drink                                  | do you drink now                                                          | yes                | yes                 |
| NELCS        | two years ago how often did you drink...?           | two years ago how often did you drink                                     | no                 | yes                 |
| MSK          | "ever had a glass of .."                            | none - can calculate                                                      | yes                | yes                 |
| WELD         | at least once a month for six months or more        | none                                                                      | yes                | yes                 |
| UCLA         | one alcoholic drink per month for at least 6 months | none - can calculate                                                      | yes                | yes                 |
| Moffitt      | "at least once a week for one year"                 | "do you still drink...?"                                                  | yes                | yes                 |
| FHS          | at least once a month for six months or more        | none                                                                      | yes                | yes                 |
| Toronto      | only asks two years ago                             | two years ago                                                             | no                 | yes                 |
| Montreal     | "ever drink.... Regularly?"                         | do you still drink it regularly...?                                       | yes                | yes                 |
| Hawaii       | ever drinker on a weekly basis                      | do you currently drink...?                                                | yes                | yes                 |
| CAPUA        | only asks two years ago                             | past five years                                                           | no                 | yes                 |
| Spain        | ever drink                                          | none - can calculate                                                      | yes                | yes                 |
| Israel       | at least once a week for one year                   | none                                                                      | yes                | yes                 |
| ICARE        | none - can calculate                                | regular alcohol consumption everyday (at least 1/2 litre of wine per day) | yes                | yes                 |

|        |                                            |                                                                     |     |     |
|--------|--------------------------------------------|---------------------------------------------------------------------|-----|-----|
| EAGLE  | yes                                        | "during the last year"                                              | yes | yes |
| ESTHER | none - can calculate                       | how many days per week have you drunk alcohol in the last 12 months | yes | yes |
| CE     | "Have you ever consumed alcoholic drinks?" | one year ago                                                        | yes | yes |
| EPIC   | multiple time variables                    | drinks at recruitment                                               | yes | yes |
| Seoul  | none - can calculate                       | "how often do you drink more than two cups of soju or beer?"        | no  | yes |
| Aichi  | do you drink...                            |                                                                     | yes | yes |

---



| Wine Detail | Other Beverages included | Beer size                   | wine size                 | liquor size               | other size                       |
|-------------|--------------------------|-----------------------------|---------------------------|---------------------------|----------------------------------|
| no          | no                       | cans, bottles or 12oz glass | 4oz glass                 | 1.5 oz shots              |                                  |
| no          | no                       | bottles/cans                | glasses                   | ounces                    |                                  |
| yes         | no                       |                             |                           |                           |                                  |
| no          | no                       |                             |                           |                           |                                  |
| no          | no                       | 12 oz cans or bottles       | 4oz glass                 | 1oz shots                 |                                  |
| no          | no                       | cans or pints or glasses    | glasses, bottle, 375, 750 | drinks or ounces or shots |                                  |
| yes         | other/liquor             | 12 oz beer                  | 3.6 oz glass              | shots                     |                                  |
| no          | no                       | 12 oz cans or bottles       | 4oz glass                 | 1oz shots                 |                                  |
| yes         | port                     | 12 oz bottle                | 5 oz glass                | 1.5 oz shots              | 3 oz shots sherry, port, liqueur |
| no          | no                       | drinks                      | drinks                    | drinks                    |                                  |
| no          | no                       | 12 oz can                   | 4 oz glass                | 1.5 oz shots              |                                  |
| yes         | champagne, cider, brandy | in 200ml increments         | in 100ml increments d/w/m | in 50ml increments d/w/m  | champagne or cider 25ml/d/w/m    |
| yes         |                          | glasses                     | glasses                   | glasses                   | brandy, jerez, aguardiente       |
| yes         | other/liquor             | beer, can                   | wine, glass               | shot glass                |                                  |
| no          | aperitif                 | nombre de verres            | nombre de verres          | nombre de verres          |                                  |

|    |                |                            |                 |                                                    |                             |
|----|----------------|----------------------------|-----------------|----------------------------------------------------|-----------------------------|
| no | aperitif       | cans or bottles<br>of beer | glasses of wine | glasses of<br>hard liquor,<br>bitters,<br>liqueurs |                             |
| no | no             | beer .33L                  | wine .25L       | .02L                                               |                             |
| no | no             | bottles                    | glasses         | grams                                              |                             |
| no | fortified wine | glasses                    | glasses         | glasses                                            | fortified wine -<br>glasses |
| no | sake, sochu    | soju - bottles             |                 |                                                    |                             |
| no | sake, sochu    |                            |                 |                                                    |                             |

---

---

---

notes

---

pints x1.5  
cans

average bottle  
of soju is 375  
ml

---

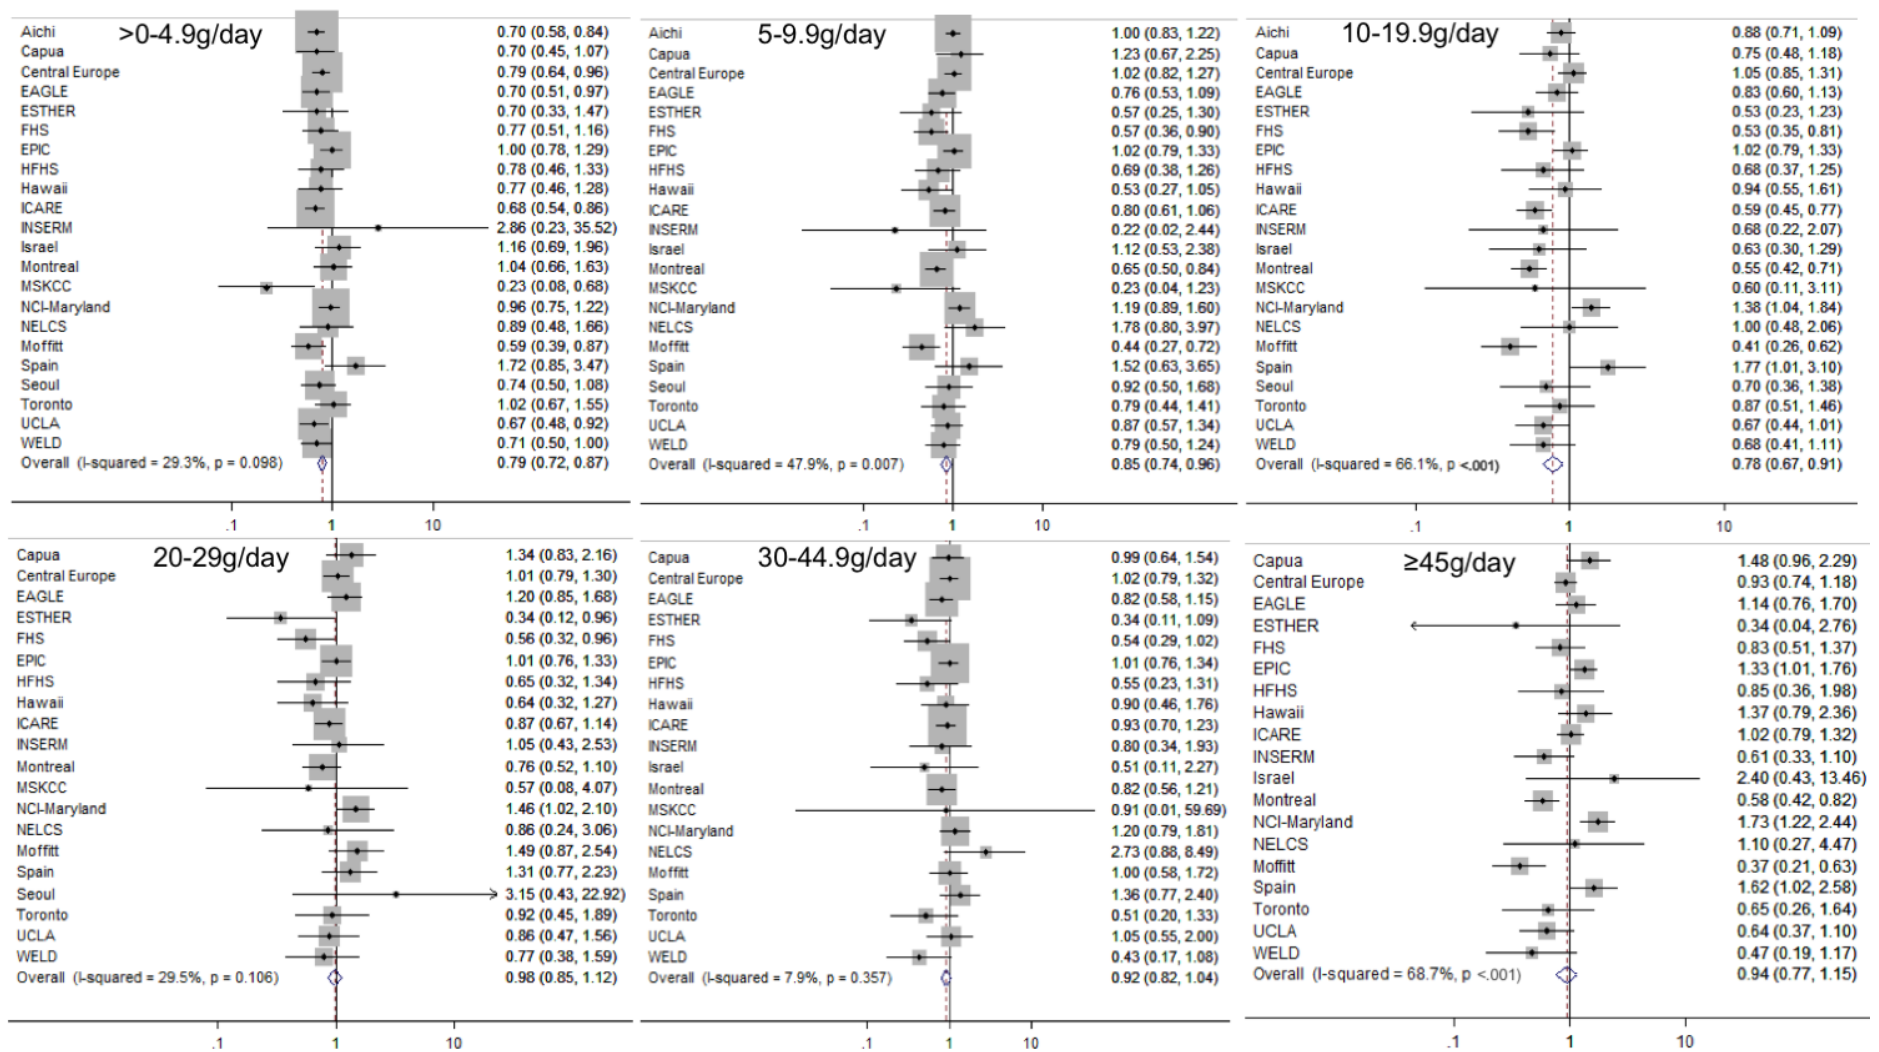

Supplementary Figure 1 | Study-specific effect estimates across alcohol intake categories. All comparisons are relative to 0g/day consumption categories. Effect estimates (OR/RR/HR) and 95% confidence intervals estimated within studies and overall summary effects estimated from random-effects models.
